# Supplementary material
Source: PubMed Central journal article supplement (PMC6207344)

# Supplementary Figure 1

**A**

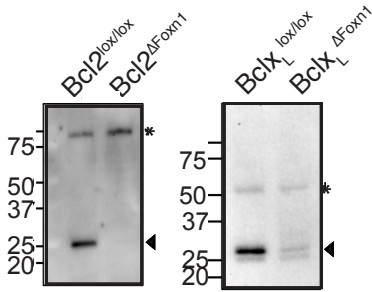

**B**

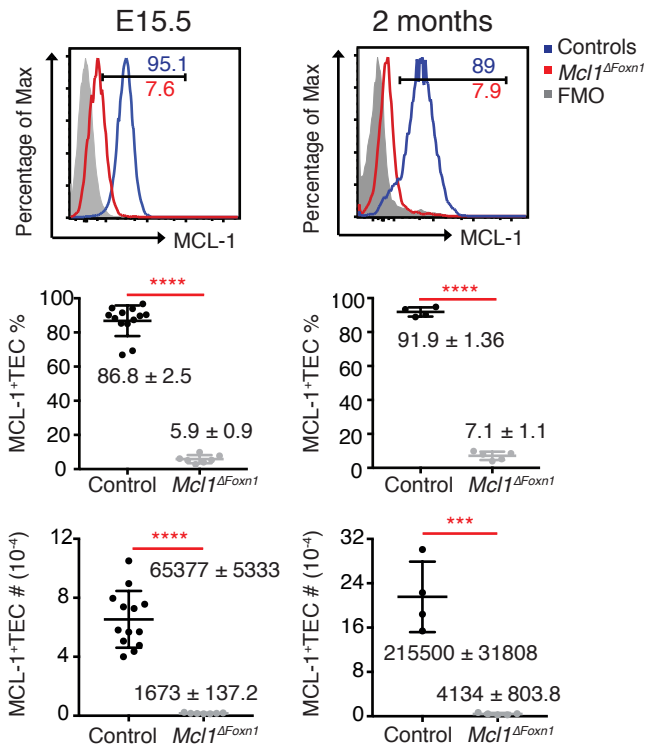

**C**

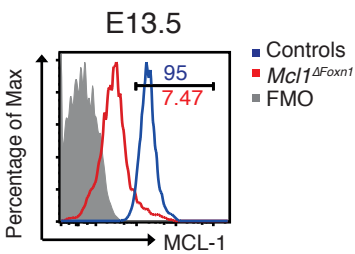

# Supplementary Figure 2

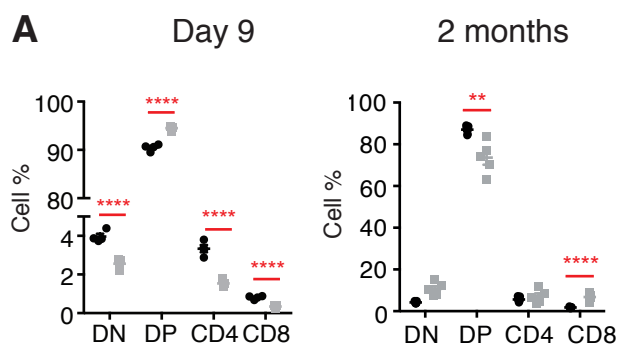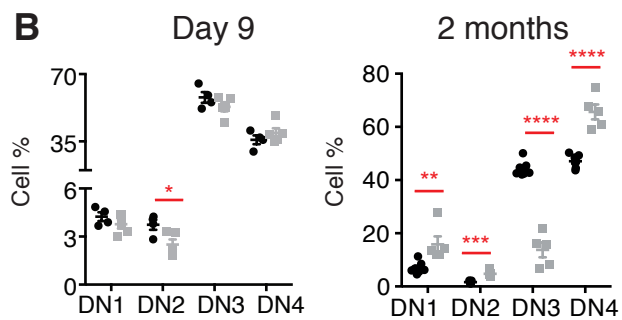

# Supplementary Figure 3

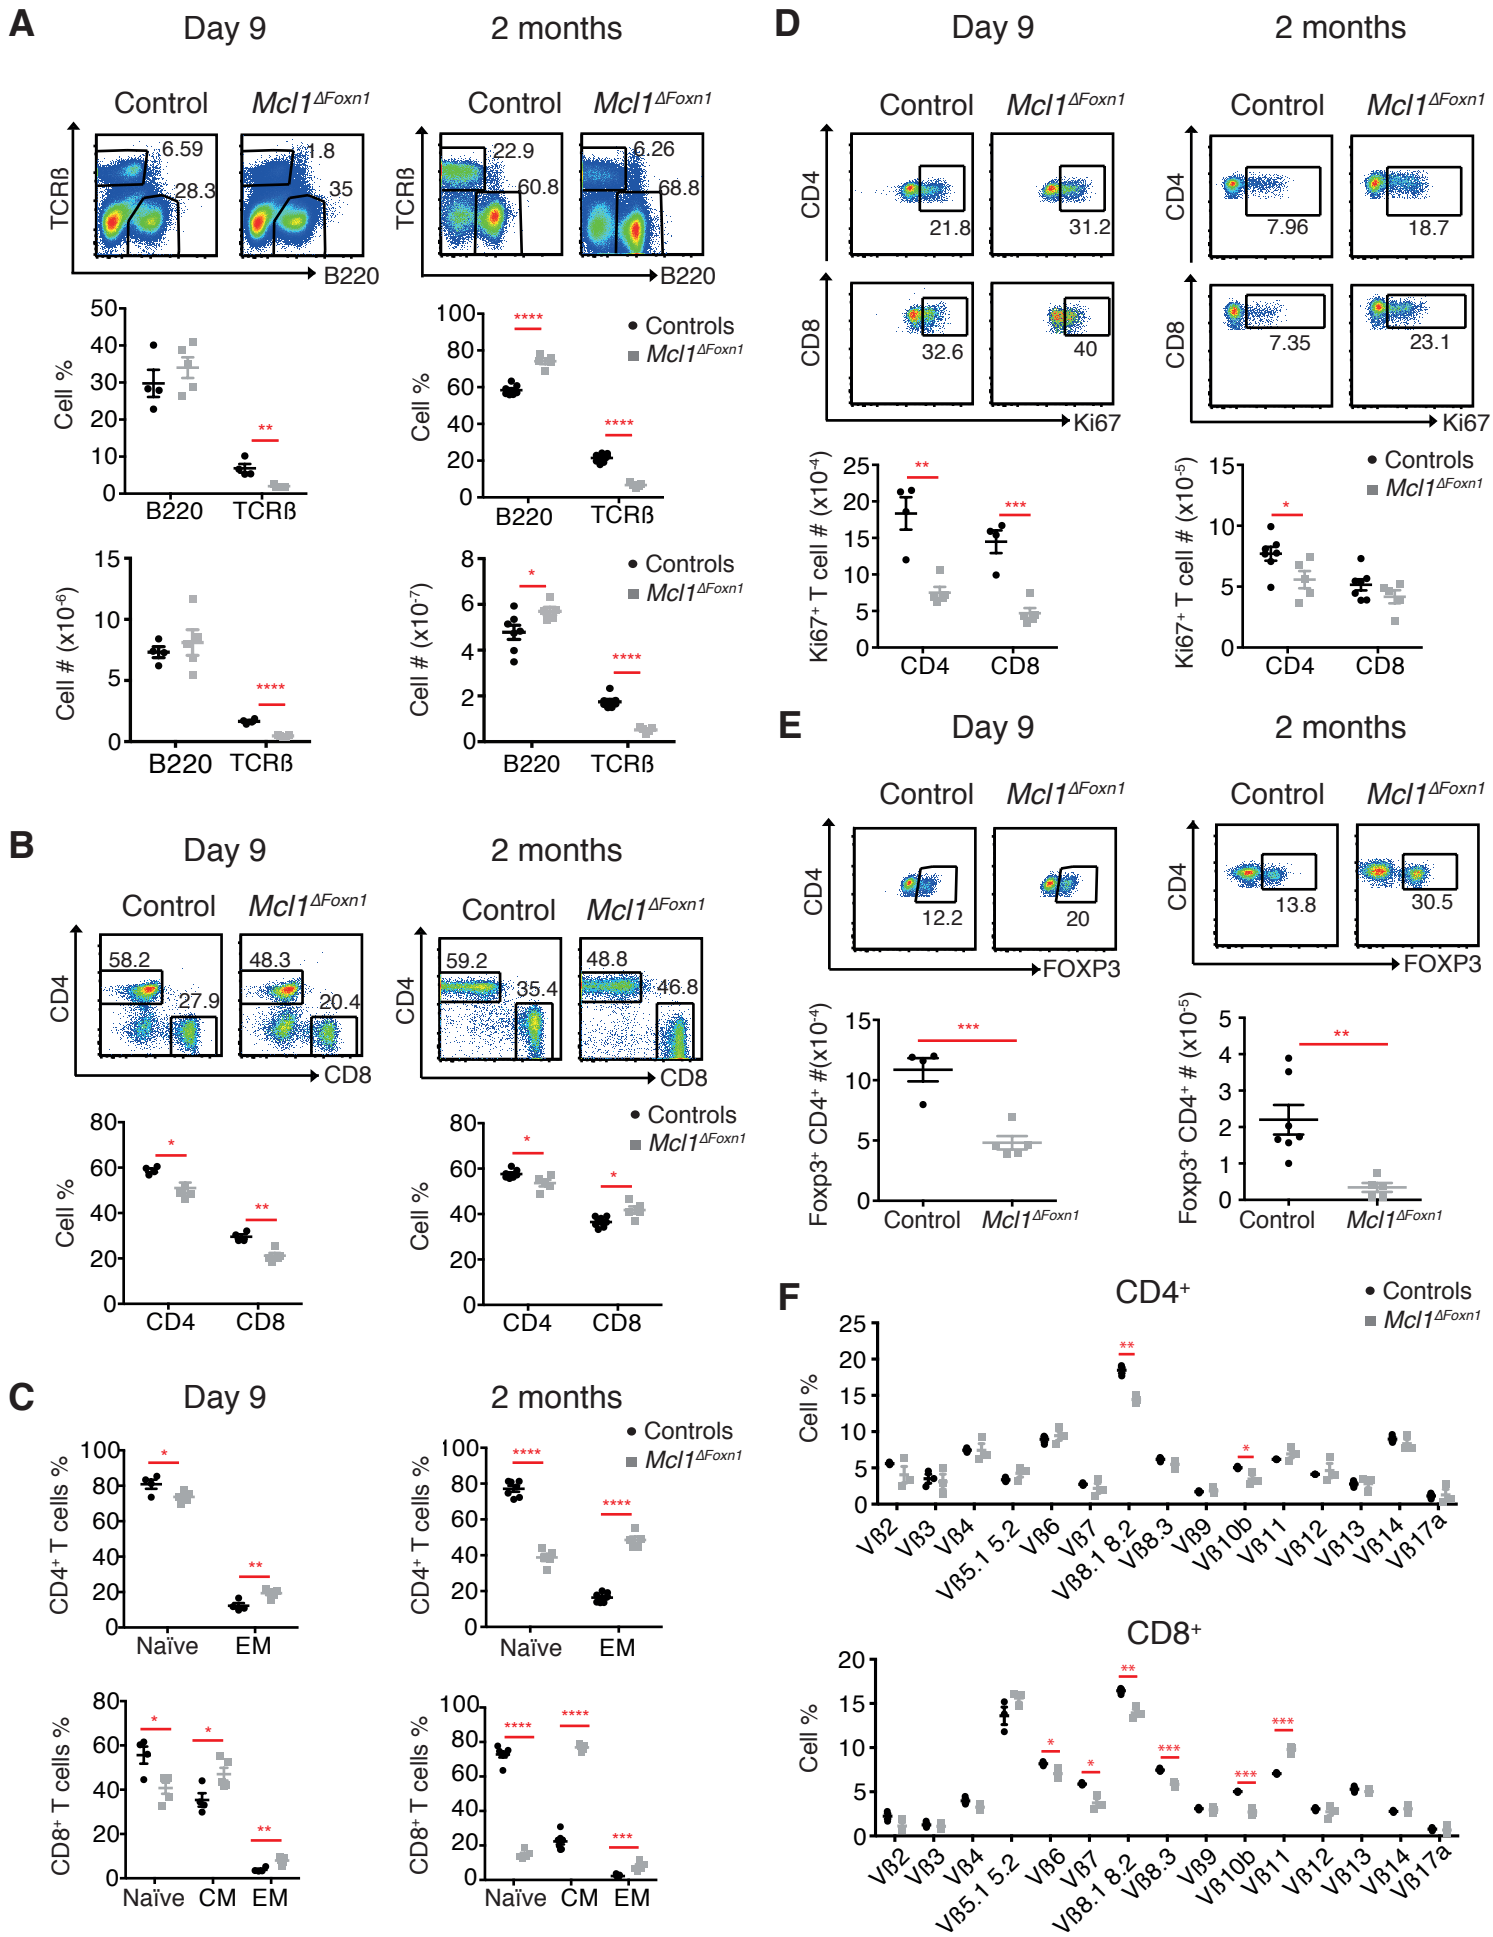

Supplementary Figure 4

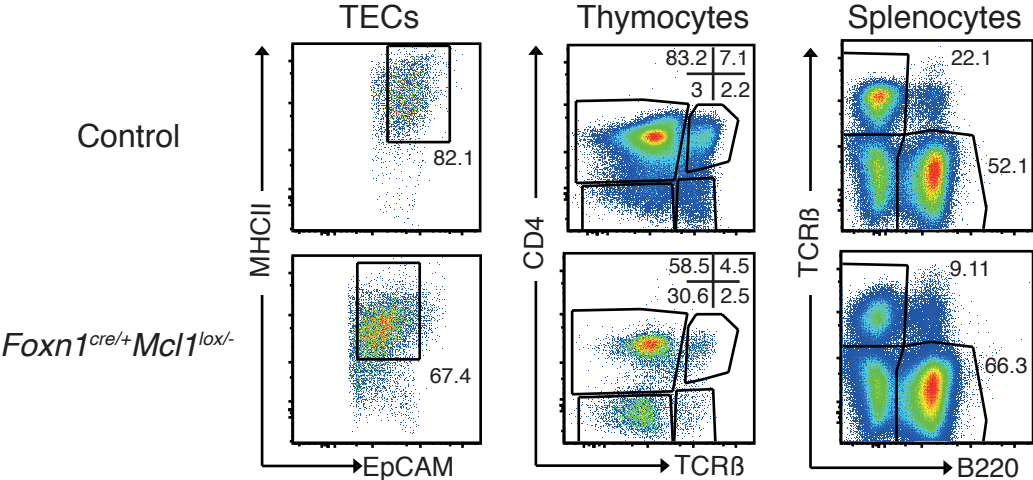

# Supplementary Figure 5

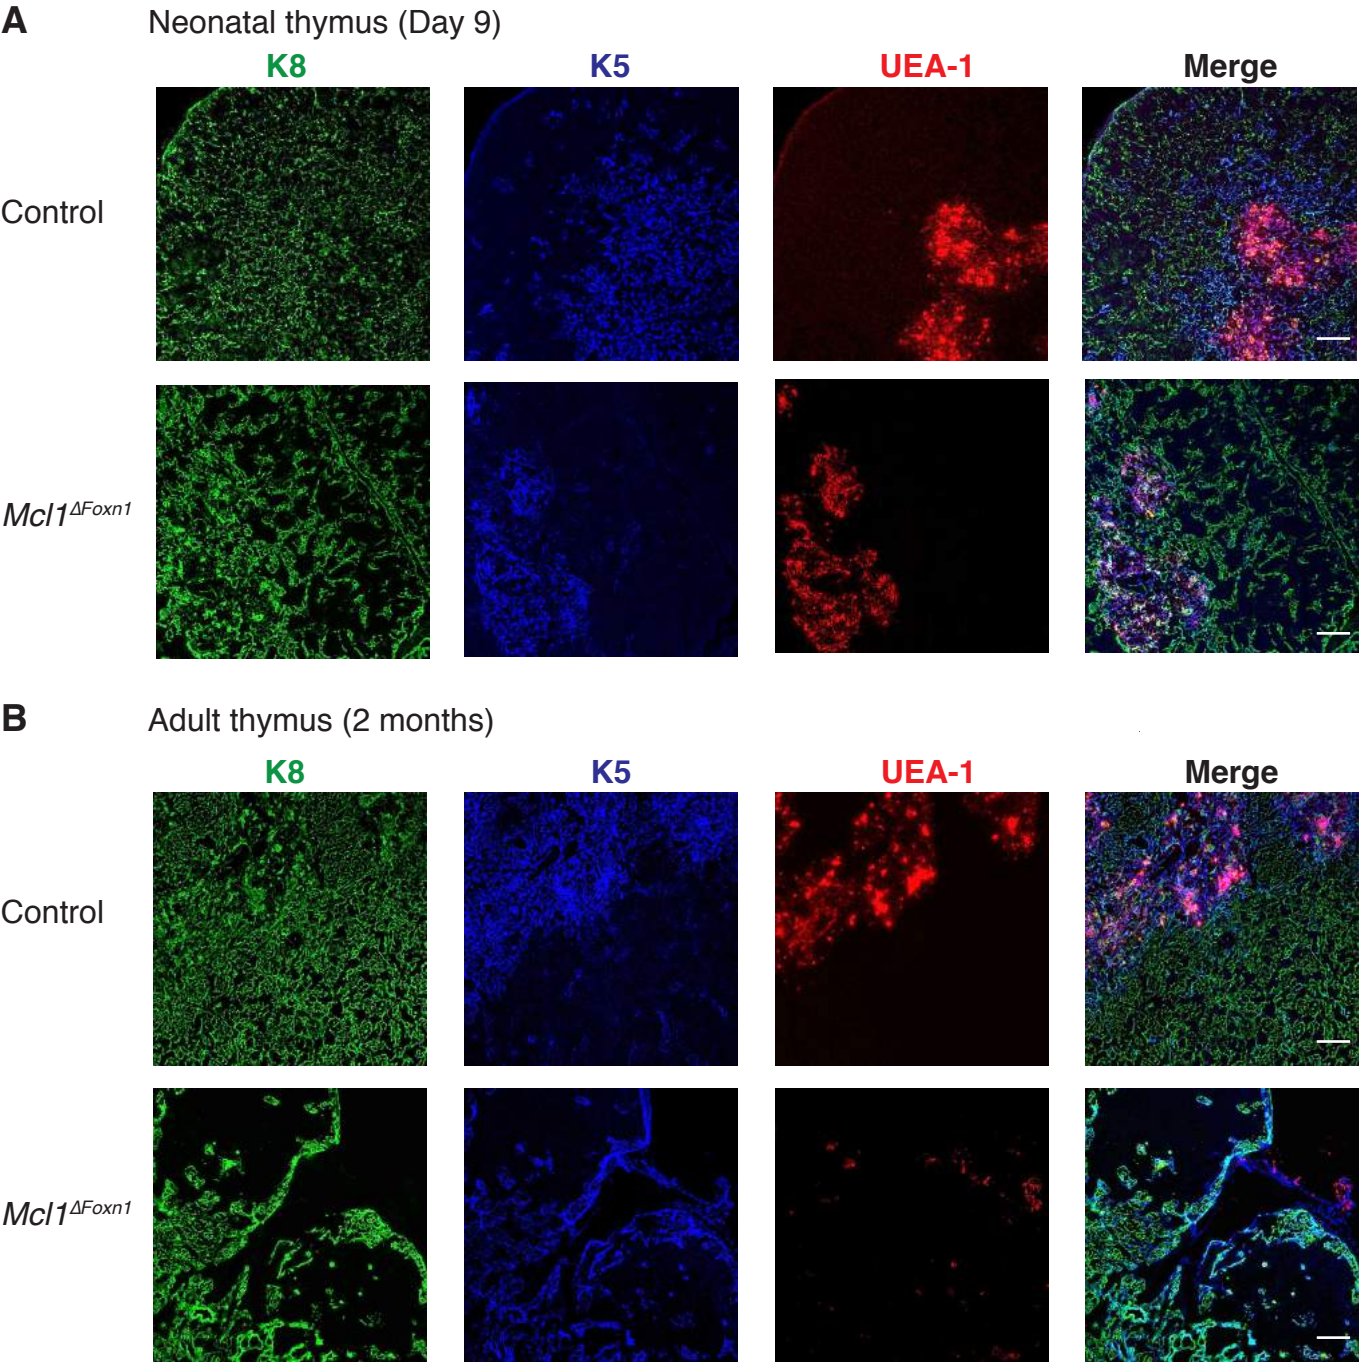

# Supplementary Figure 6

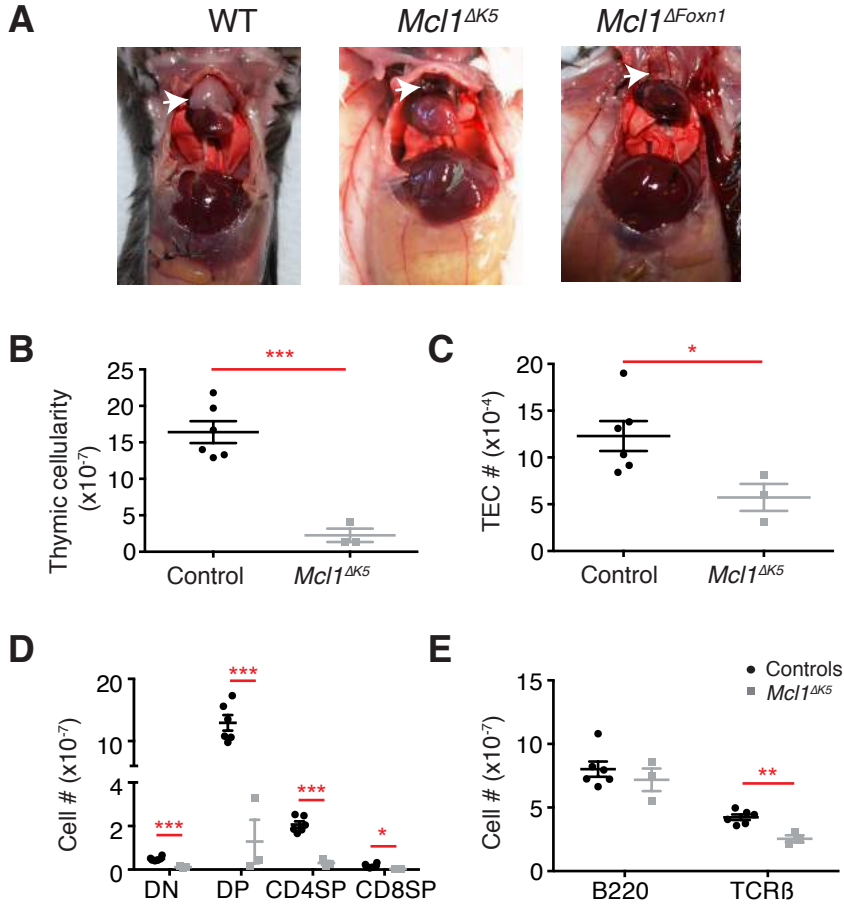

Supplement: NIHMS79733-supplement-Supplementary_figures.pdf [file NIHMS79733-supplement-Supplementary_figures.pdf]
